# Supplementary material
Source: Research Square preprint supplement (doi:10.21203/rs.3.rs-9449869/v1)
Supplement: Supplementary file 2 [file bafe811498b29a5e83b47e0e.docx]

Supplementary file 2

**Supplementary table 1.** Mean intakes in wave 1 and wave 2 for the Nutri+ questionnaire.

| **Food group** | **Wave 1  Mean (SD)** | **Wave 2  Mean (SD)** | **Group level  bias (%)1** | **Intra-class  correlation** | **95% Confidence interval** |
| --- | --- | --- | --- | --- | --- |
| Alcohol | 182 (197) | 160 (160) | 14 | 0.87 | 0.84, 0.91 |
| Coffee | 552 (318) | 560 (333) | -1 | 0.86 | 0.83, 0.90 |
| Dairy | 284 (251) | 281 (221) | 1 | 0.61 | 0.54, 0.67 |
| Eggs | 28 (19) | 28 (20) | -1 | 0.75 | 0.68, 0.81 |
| Fish | 53 (45) | 44 (32) | 19 | 0.65 | 0.53, 0.73 |
| Fruit | 185 (117) | 166 (95) | 11 | 0.69 | 0.64, 0.76 |
| Legumes* | 49 (47) | 45 (44) | 8 | 0.78 | 0.71, 0.85 |
| Meat | 325 (219) | 310 (203) | 5 | 0.70 | 0.61, 0.77 |
| Nuts and seeds | 25 (21) | 26 (21) | -3 | 0.69 | 0.61, 0.75 |
| Potatoes | 82 (45) | 85 (44) | -3 | 0.88 | 0.85, 0.90 |
| Ready-to-eat meals | 121 (110) | 104 (71) | 17 | 0.62 | 0.48, 0.74 |
| Sauces and gravy | 18 (15) | 16 (12) | 7 | 0.38 | 0.26, 0.51 |
| Savoury snacks | 52 (46) | 58 (51) | -9 | 0.64 | 0.54, 0.75 |
| Sugar sweetened beverages and fruit juice | 333 (301) | 277 (237) | 20 | 0.75 | 0.67, 0.81 |
| Sweet snacks | 75 (58) | 70 (53) | 7 | 0.76 | 0.69, 0.80 |
| Tea | 462 (376) | 469 (368) | -1 | 0.90 | 0.87, 0.92 |
| Vegetables | 122 (58) | 112 (53) | 9 | 0.76 | 0.70, 0.81 |

Mean intake (SD) of the quantitative food groups in grams per day for all individuals. The food groups are listed in alphabetical order. *Legumes includes meat substitutes. 1 Group level bias = (mean wave 1 / mean wave 2) x 100 – 100
