# Supplementary material
Source: Research Square preprint supplement (doi:10.21203/rs.3.rs-9449869/v1)

**Supplementary file 1**

Bland-Altman plots for all 17 quantitative food groups.


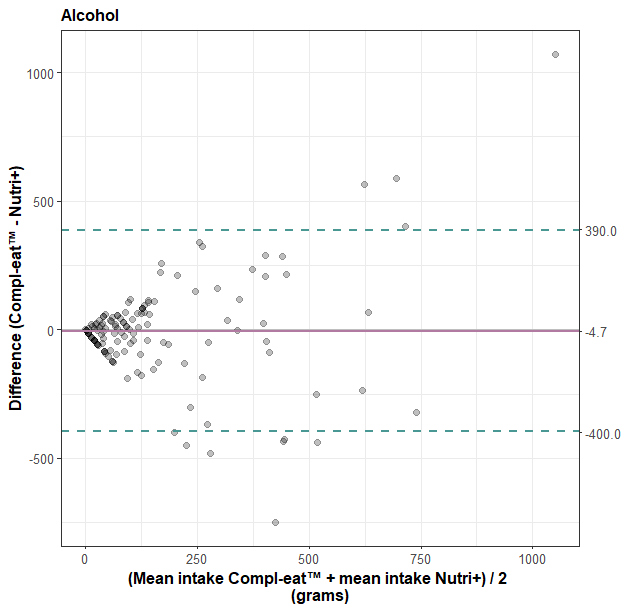


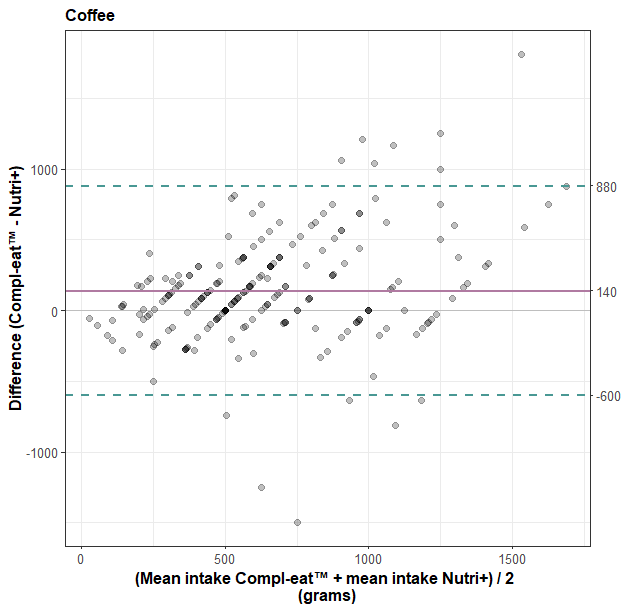


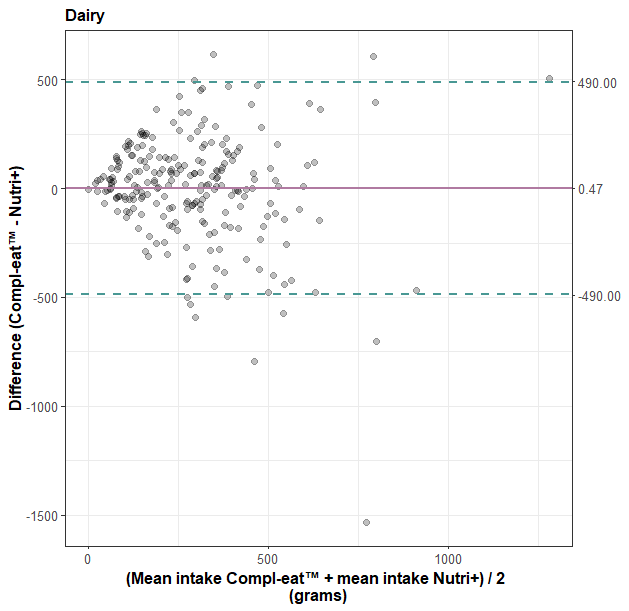


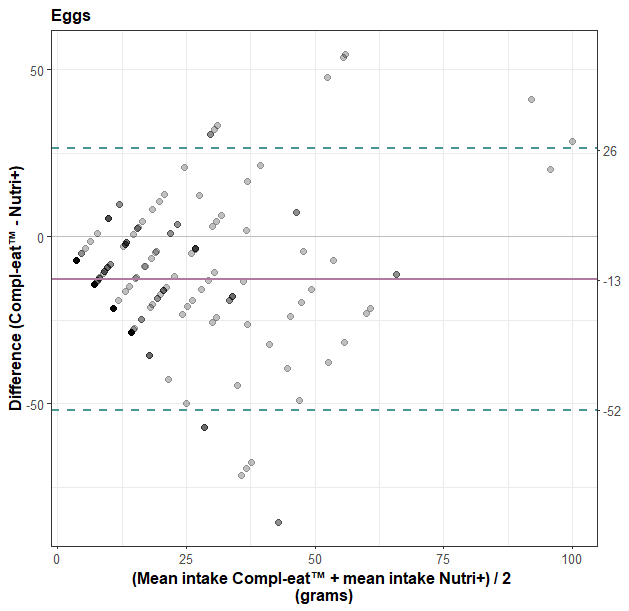


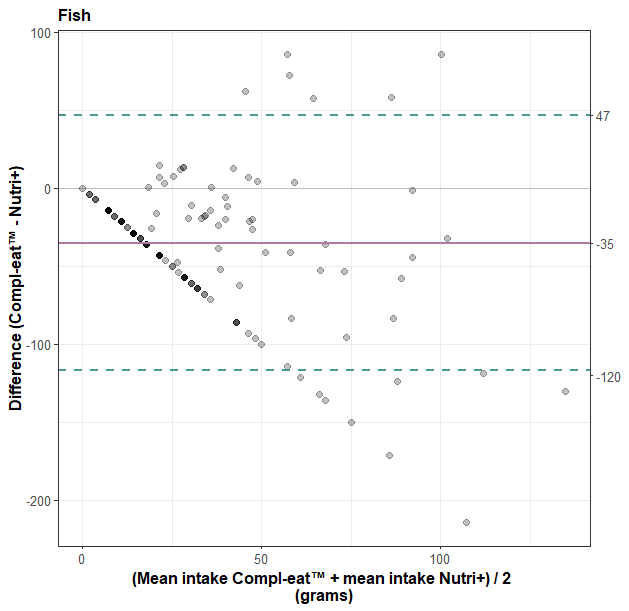


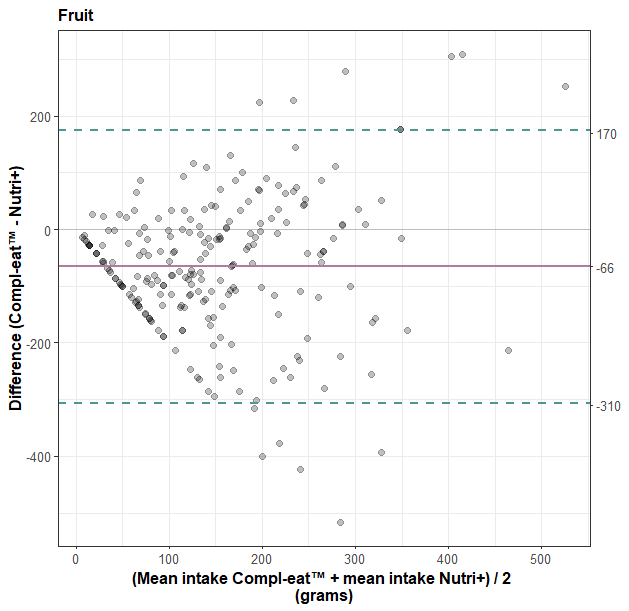


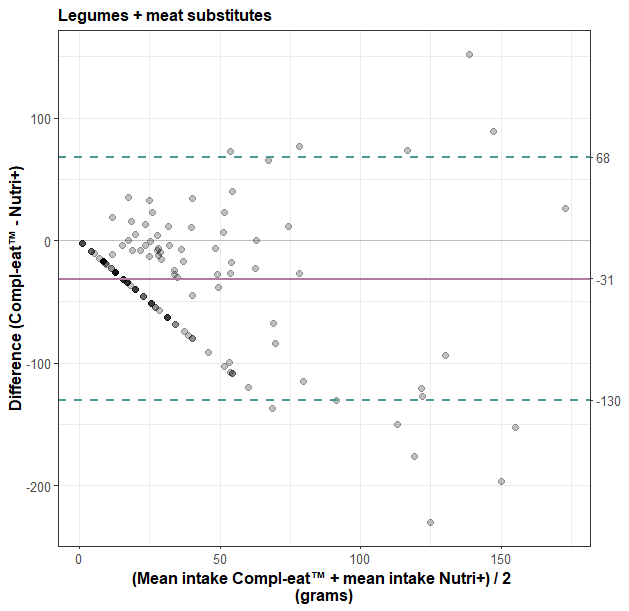


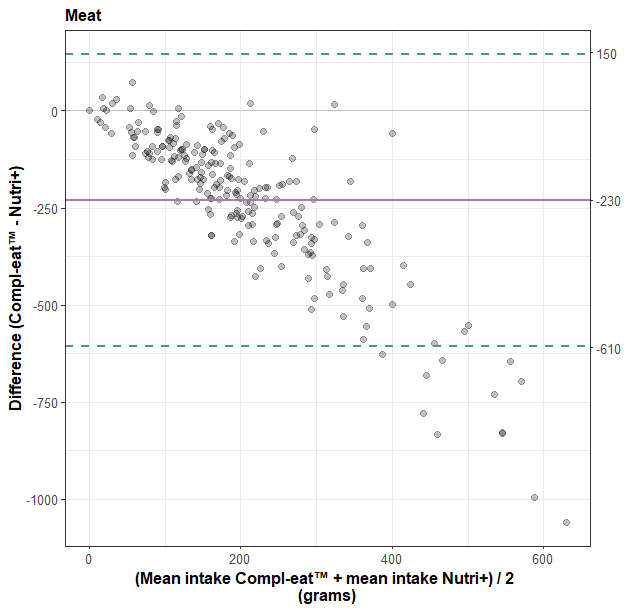


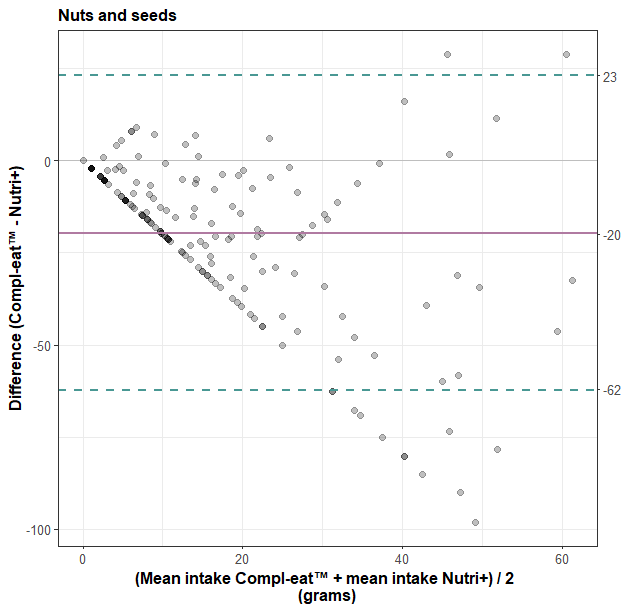


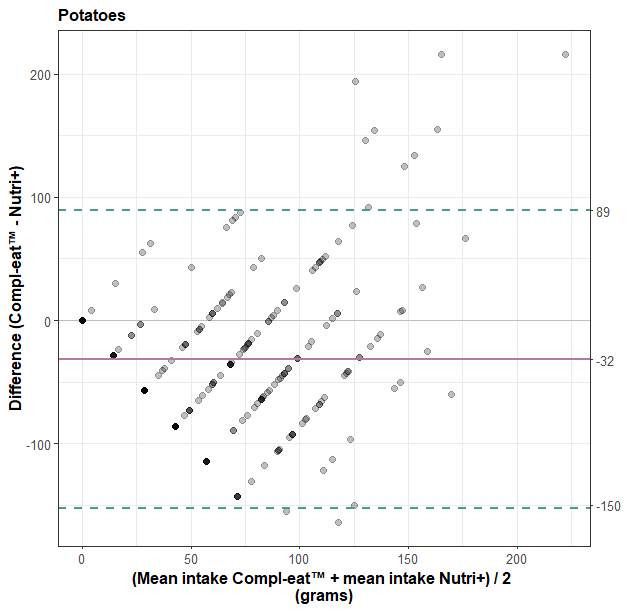


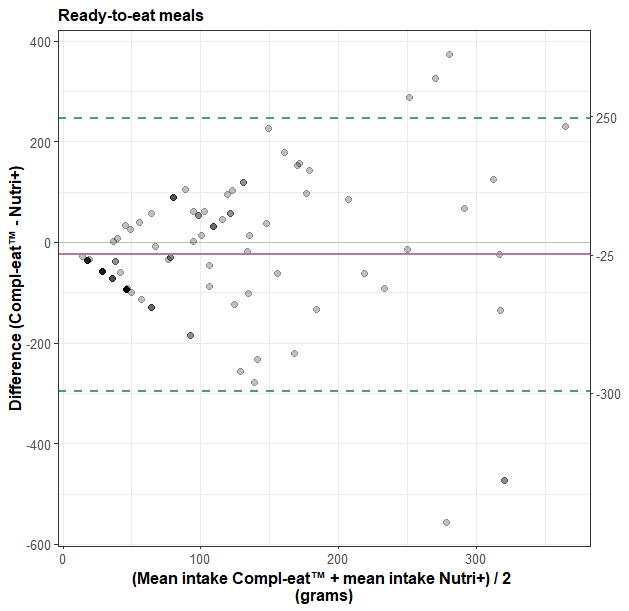


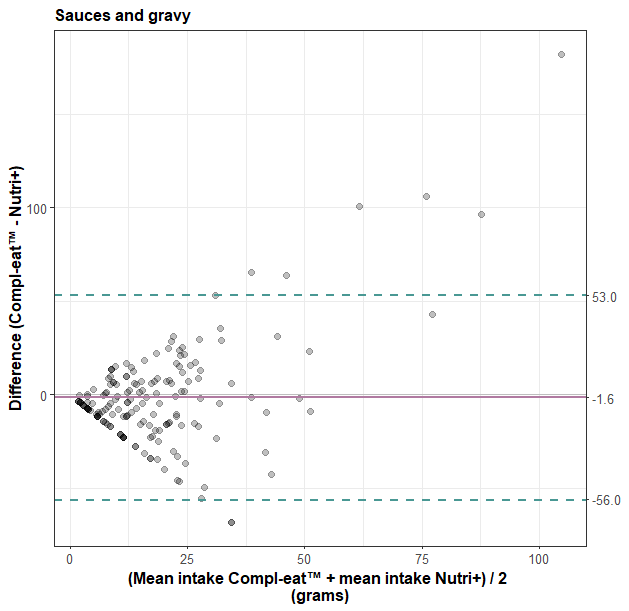


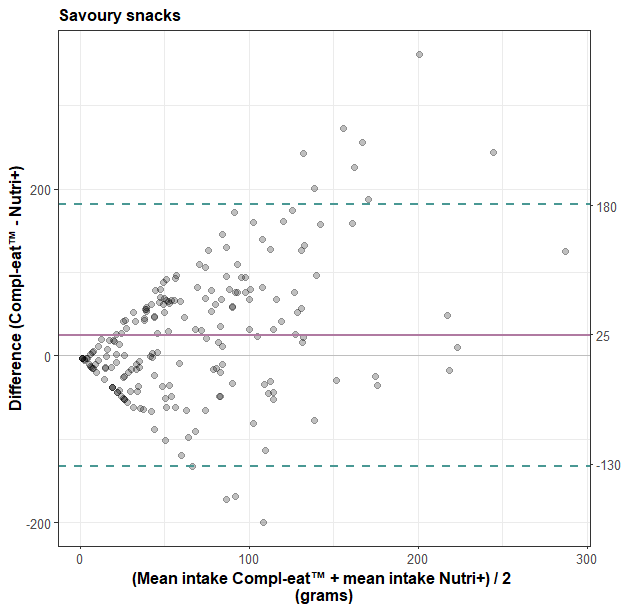


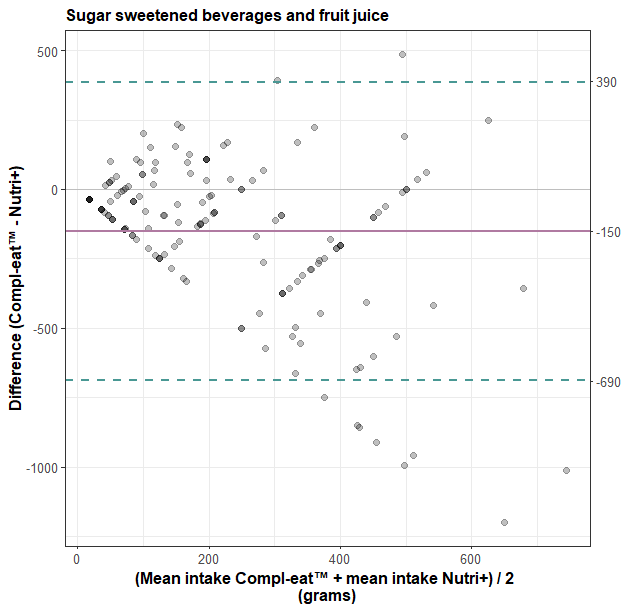


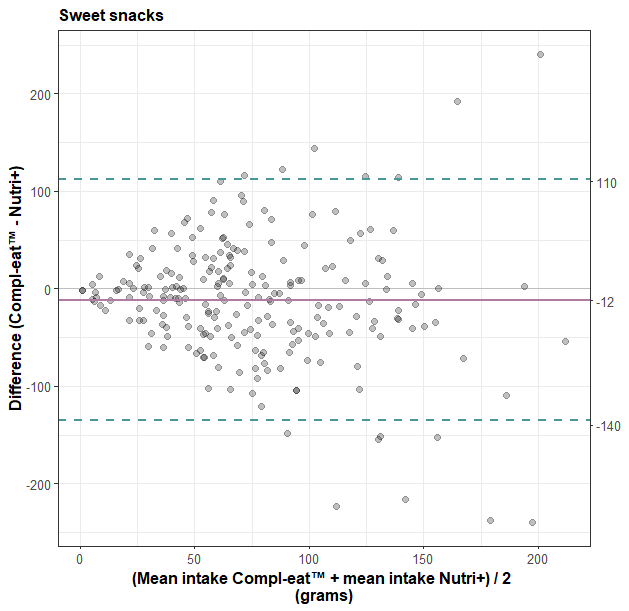


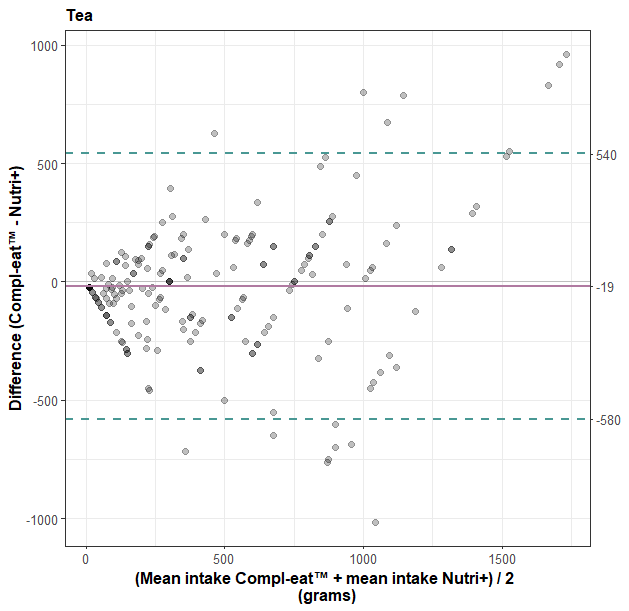


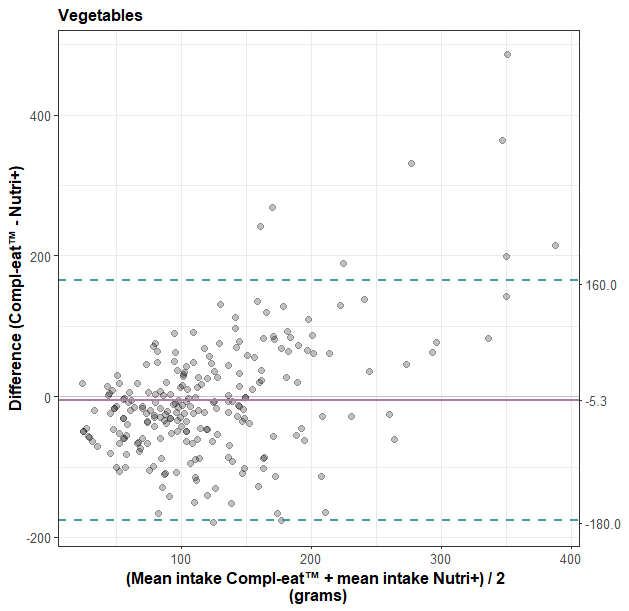

Supplement: Supplementary file 1 [file b2d3491b3bba618dc0182d3a.docx]
